# Supplementary material
Source: PubMed Central journal article supplement (PMC2446995)
Supplement: supp_190_14_4922__2.pdf [file supp_190_14_4922__2.pdf]

**Supplementary Table 1. Primers used in this work**

---

| <b>Target gene</b> | <b>Primer</b> | <b>Sequence<sup>a</sup></b>              |
|--------------------|---------------|------------------------------------------|
| <i>wfaP</i>        | wl-5344       | 5-CGGGATCCATGGAACTAGTTAGCATCATTA-3       |
|                    | wl-5345       | 5-GGAATTCCTAAGCATTTCCTTTATCTCTAT-3       |
|                    | wl-13505      | 5-CATGCCATGGGCATGGAACTAGTTAGCATCATTAT-3  |
|                    | wl-13506      | 5- GGAATTCCTAAGCATTTCCTTTATCTCTAT-3      |
| <i>wfgD</i>        | wl-5340       | 5-CGGGATCCATGGATGATTATTTAGTATCA-3        |
|                    | wl-5341       | 5-GGAATTCTCATTTCCTTTTACCGTTTTTAT-3       |
|                    | wl-13507      | 5- CATGCCATGGGCATGGATGATTATTTAGTATCAAT-3 |
|                    | wl-13508      | 5- GGAATTCTCATTTCCTTTTACCGTTTTTATAGT-3   |

---

a The underlined sequences indicate restriction sites.
